# Supplementary material for: Co(II)-doped hybrid Zn(II) tetraborate complexes, [ZnxCo(1−x)(1,3-dap)B4O7] (1,3-dap = 1,3-diaminopropane): BET analysis and N2/H2O/D2O adsorption studies
Source: Royal Society of Chemistry journal article supplement (doi:10.1039/d4dt00117f), 2024-01-01
Supplement: d4dt00117f1.pdf [file d4dt00117f1.pdf]

## Supporting information

**Co<sup>(II)</sup>-doped hybrid Zn<sup>(II)</sup> tetraborate complexes, [Zn<sub>x</sub>Co<sub>(1-x)</sub>(1,3-dap)B<sub>4</sub>O<sub>7</sub>](1,3-dap=1,3-diaminopropane): BET analysis and N<sub>2</sub>/H<sub>2</sub>O/D<sub>2</sub>O adsorption studies.**

Lei Liu,<sup>a</sup> Chun-Yang Pan,<sup>a\*</sup> Yong He,<sup>a</sup> Li-Juan Zhong,<sup>a</sup> Michael A Beckett<sup>b</sup>

a. School of Chemical Engineering and Light Industry, Guangdong University of Technology,  
Guangzhou 510006, China.

b. School of Natural Sciences, Bangor University, Gwynedd, LL57 2UW, UK.

Correspondence: [panchuny@gdut.edu.cn](mailto:panchuny@gdut.edu.cn)

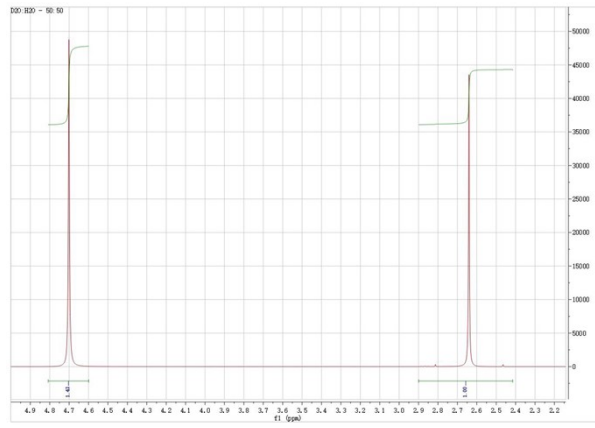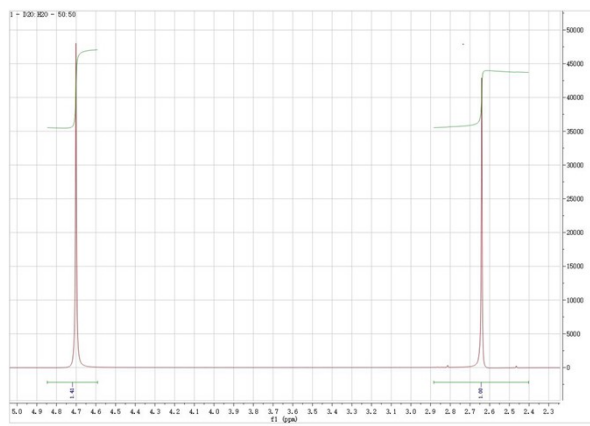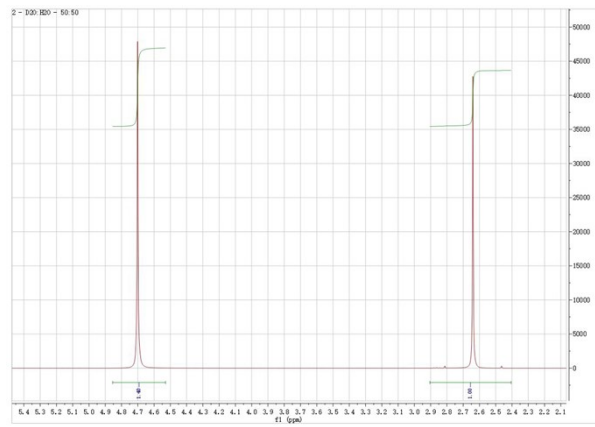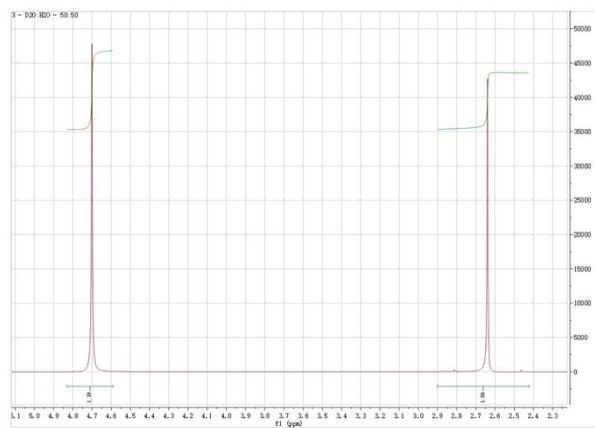

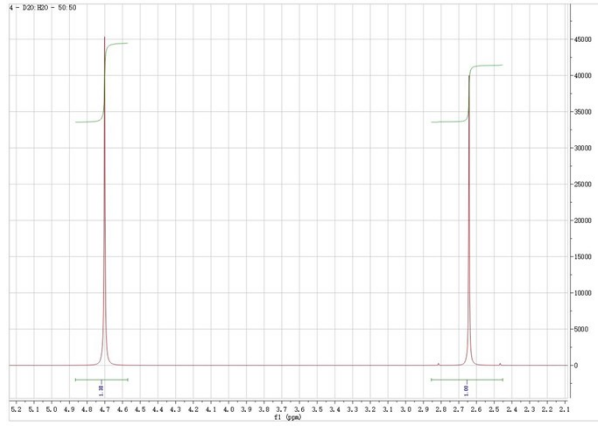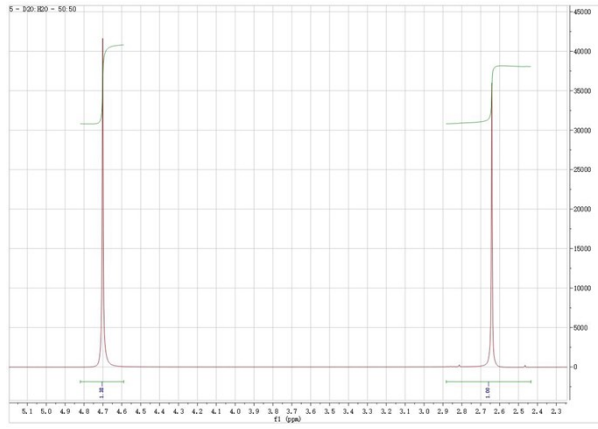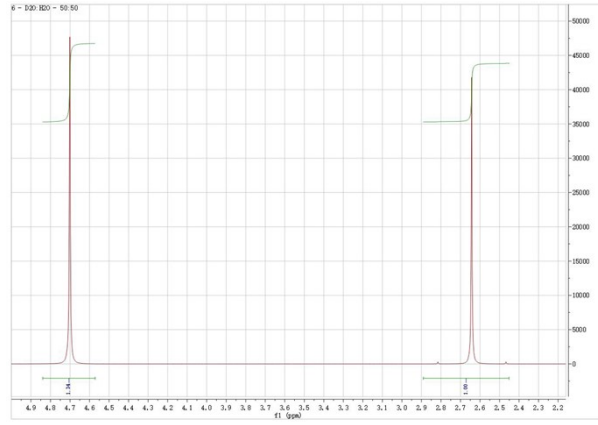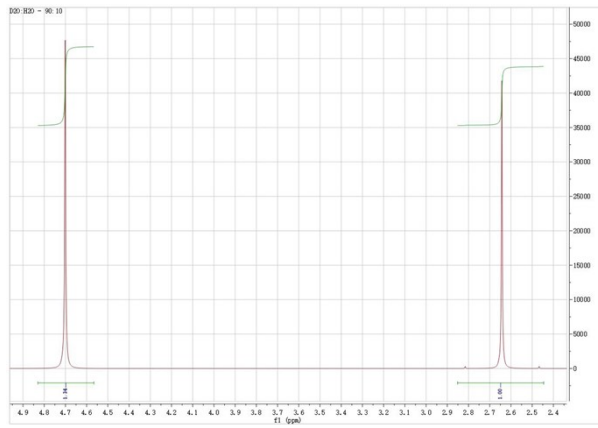

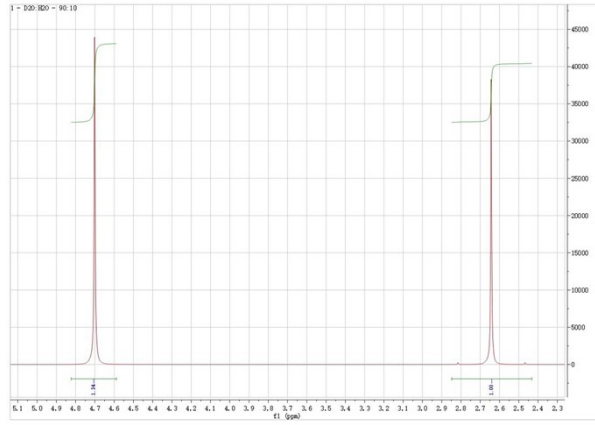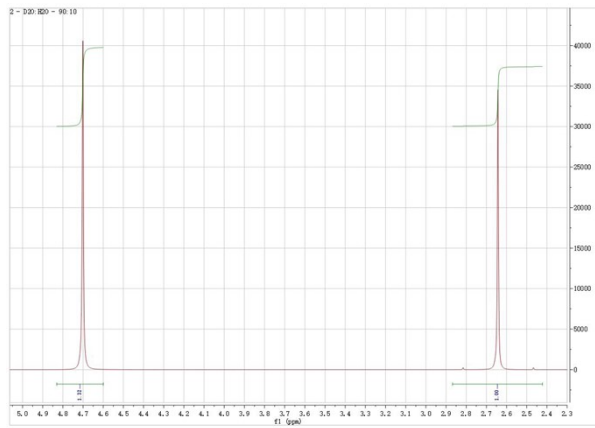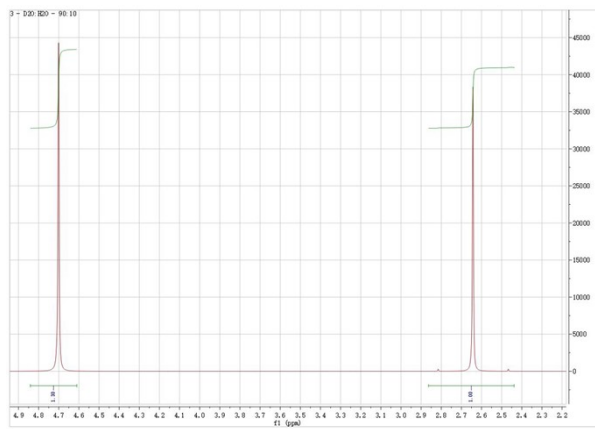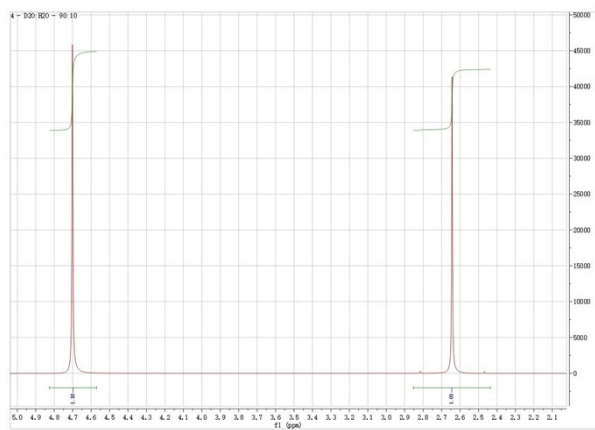

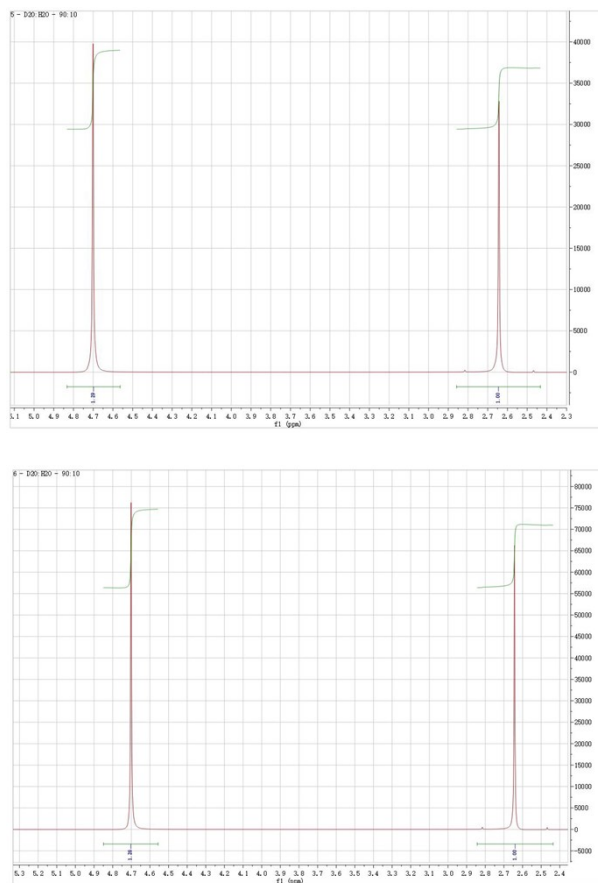

**Figure S1.**  $^1\text{H}$  NMR: the relative integral area of  $\text{H}_2\text{O}$ , relative to an internal standard, after adsorption of synthetic  $\text{D}_2\text{O}/\text{H}_2\text{O}$  mixtures by the hybrid borates **1-6**.

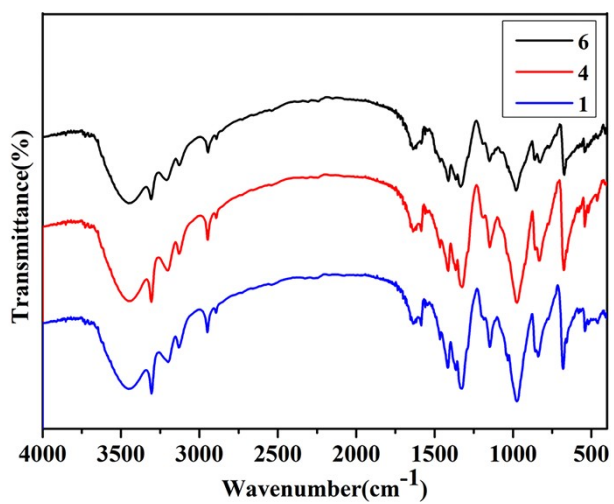

**Figure S2.** FT-IR spectra of **1**, **4** and **6**.

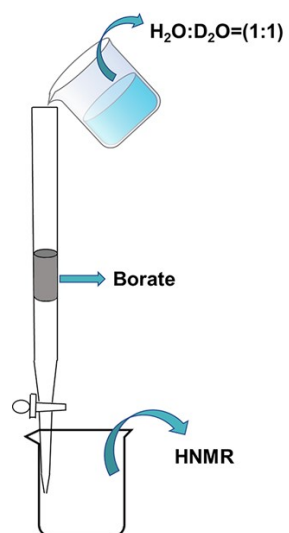

**Figure S3.** Schematic diagrams of the experimental device.
